# Supplementary material for: Antitumor profile of the PI3K inhibitor ZSTK474 in human sarcoma cell lines
Source: PubMed Central journal article supplement (PMC6205545; doi:10.18632/oncotarget.26216), 2018-10-12
Supplement: oncotarget-09-35141-s001.pdf [file oncotarget-09-35141-s001.pdf]

# Antitumor profile of the PI3K inhibitor ZSTK474 in human sarcoma cell lines

## SUPPLEMENTARY MATERIALS

A

ifosfamide

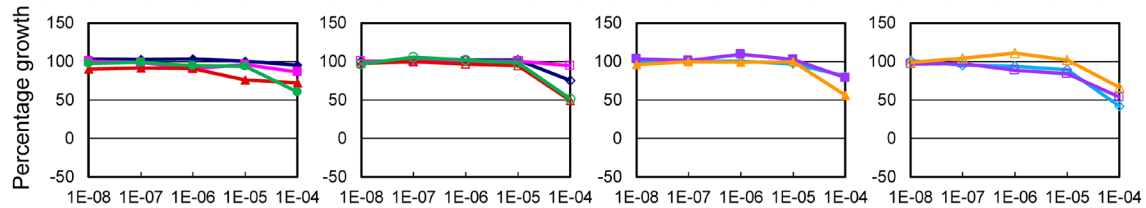

doxorubicin

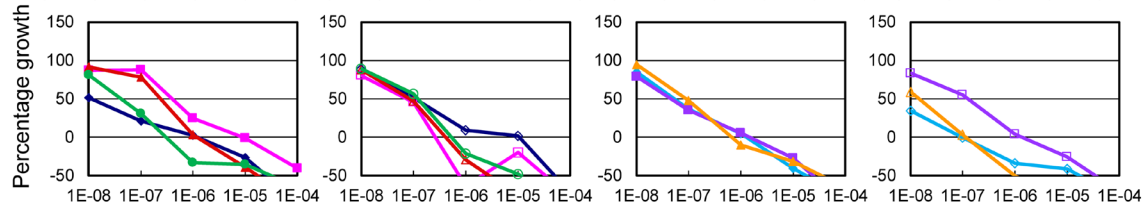

carboplatin

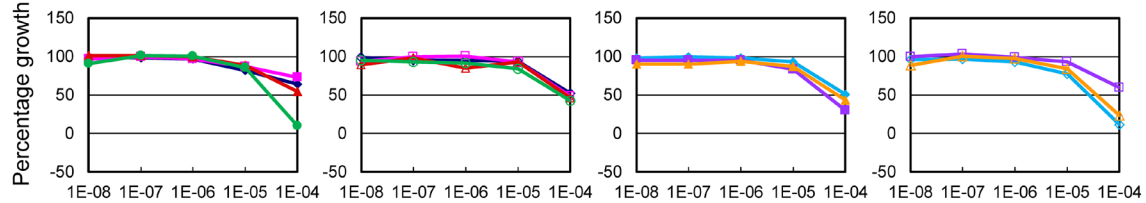

cisplatin

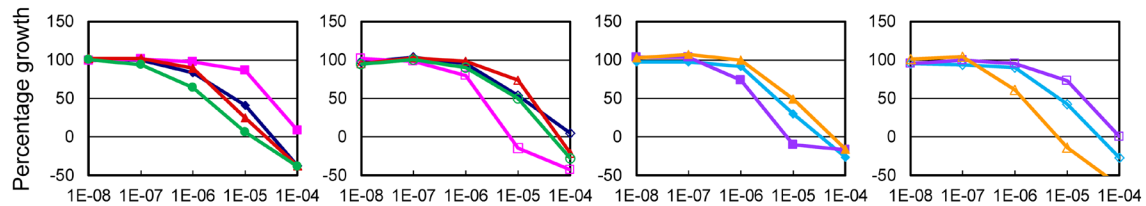

docetaxel

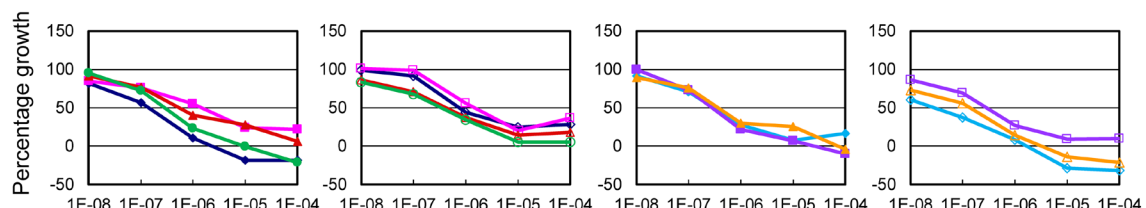

Sample concentration (M)

- ◆ HT-1080
- ◆ SW684
- ◆ GCT
- ◆ SW872

Sample concentration (M)

- ◆ SK-UT-1
- ◆ MES-SA
- ◆ SJCRH30
- ◆ RD

Sample concentration (M)

- ◆ HOS
- ◆ KHOS-240S
- ◆ Saos-2

Sample concentration (M)

- ◆ SW982
- ◆ SW1353
- ◆ RD-ES

# B

## gemcitabine

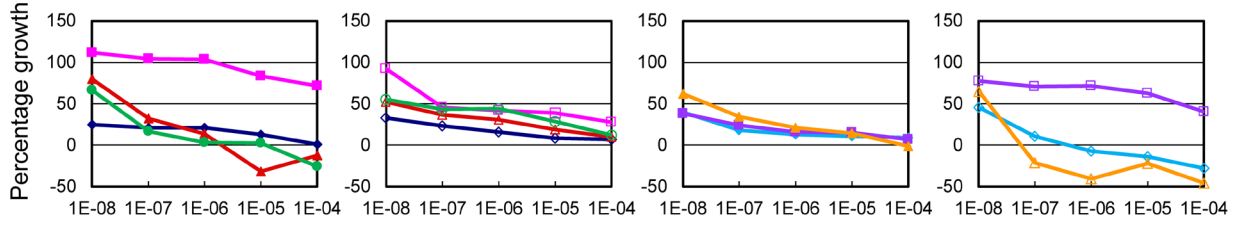

## imatinib

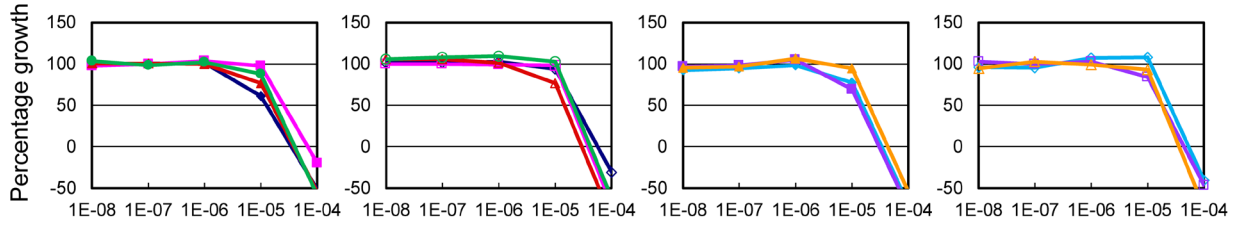

## gefitinib

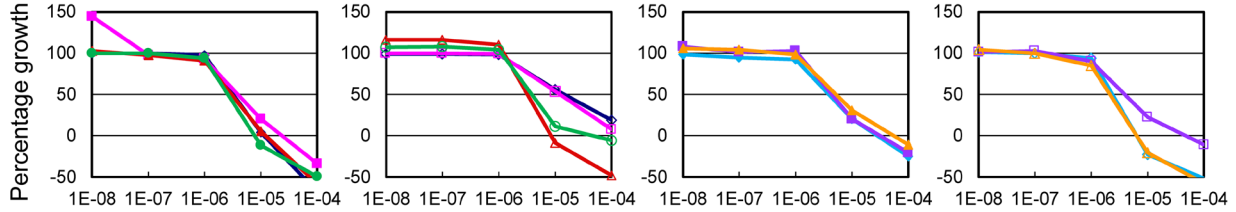

## bortezomib

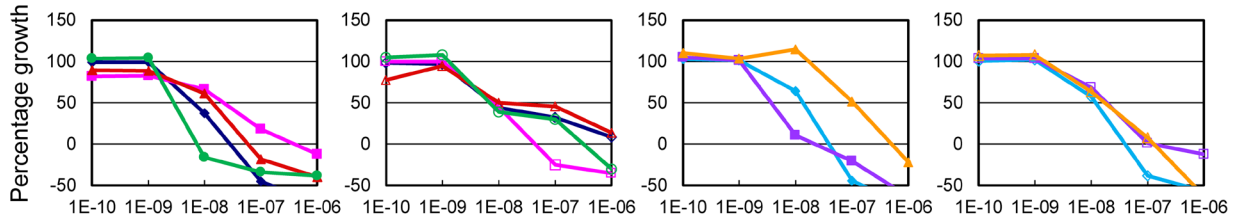

## sorafenib

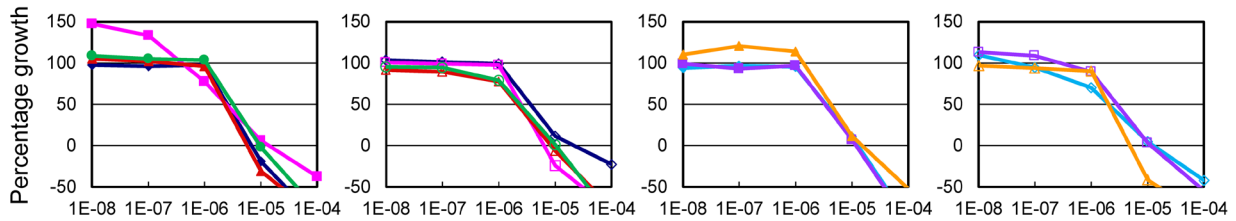

Sample concentration (M)

Sample concentration (M)

Sample concentration (M)

Sample concentration (M)

- ◆ HT-1080
- ◆ SW684
- ◆ GCT
- ◆ SW872

- ◆ SK-UT-1
- ◆ MES-SA
- ◆ SJCRH30
- ◆ RD

- ◆ HOS
- ◆ KHOS-240S
- ◆ Saos-2

- ◆ SW982
- ◆ SW1353
- ◆ RD-ES

C

sunitinib

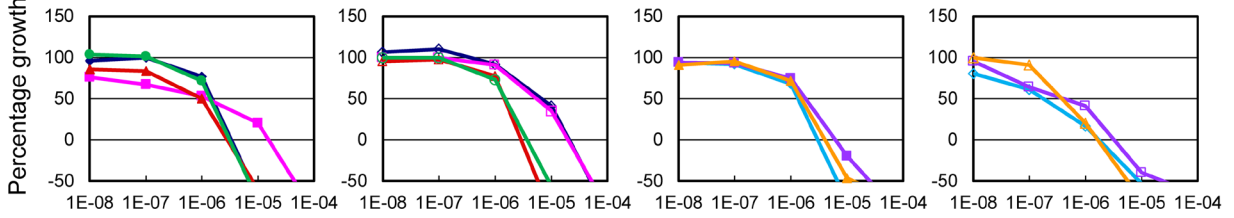

everolimus

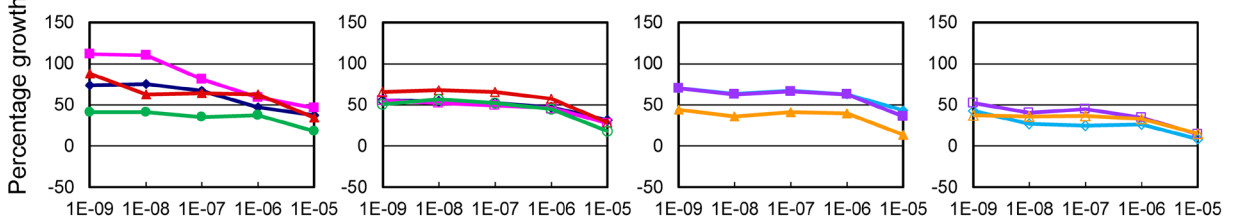

selumetinib

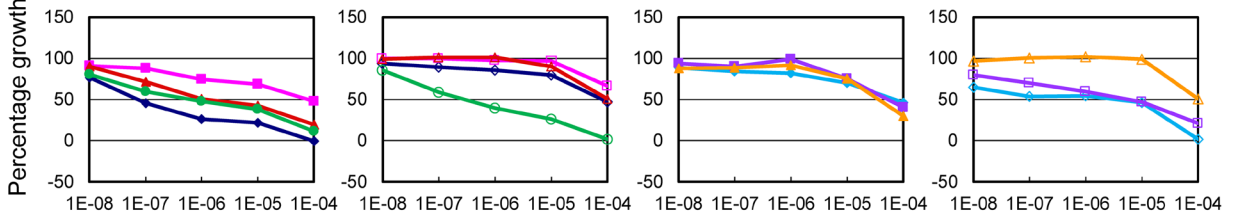

pazopanib

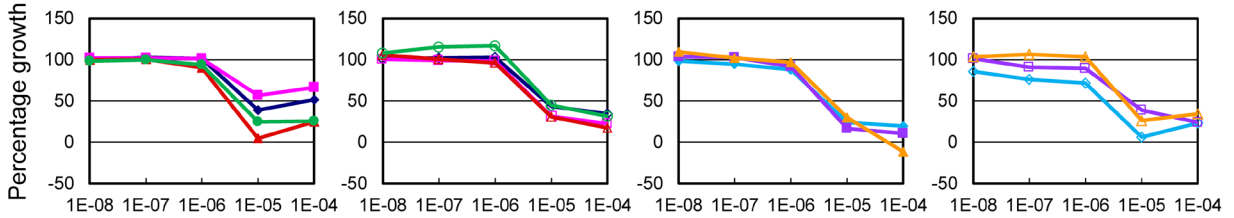

vemurafenib

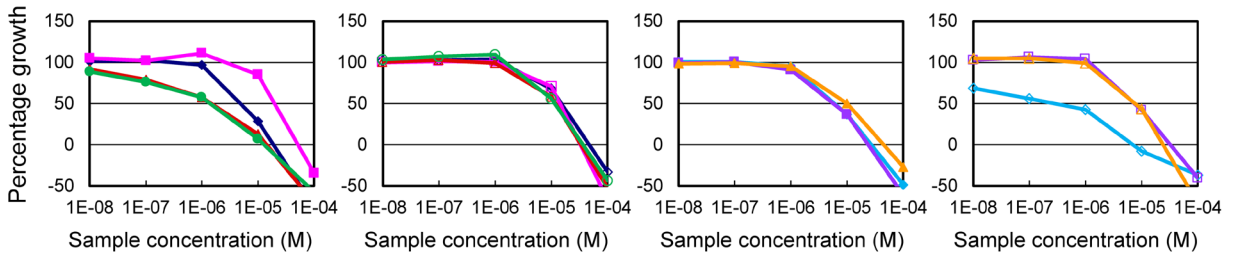

◆ HT-1080  
 ◆ SW684  
 ◆ GCT  
 ◆ SW872

◆ SK-UT-1  
 ◆ MES-SA  
 ◆ SJCRH30  
 ◆ RD

◆ HOS  
 ◆ KHOS-240S  
 ◆ Saos-2

◆ SW982  
 ◆ SW1353  
 ◆ RD-ES

D

ZSTK474

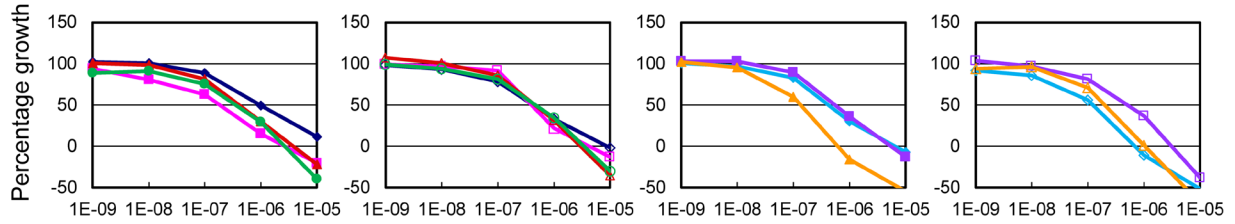

pictilicib

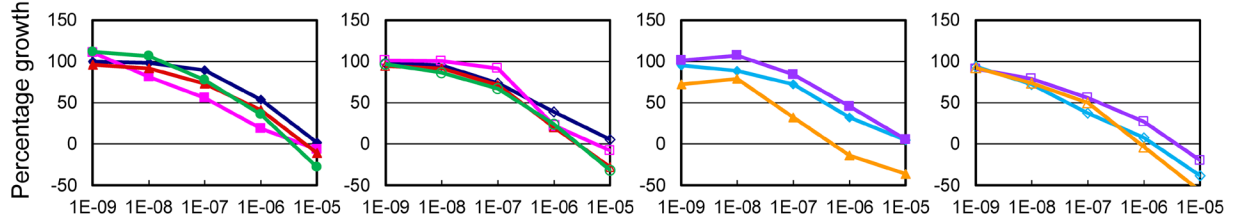

buparlisib

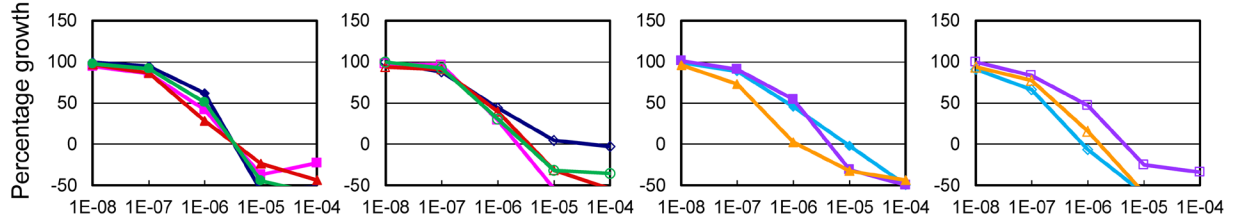

alpelisib

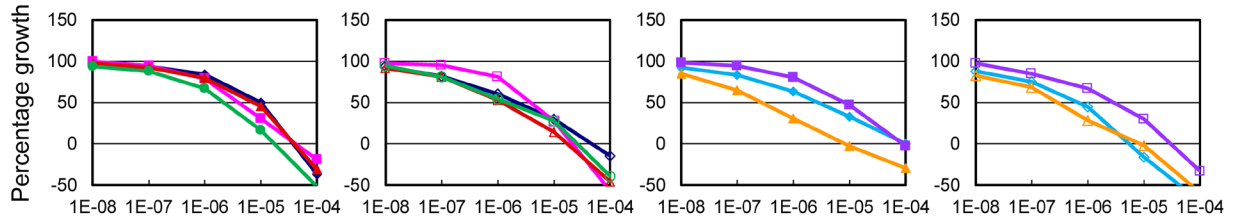

linsitinib

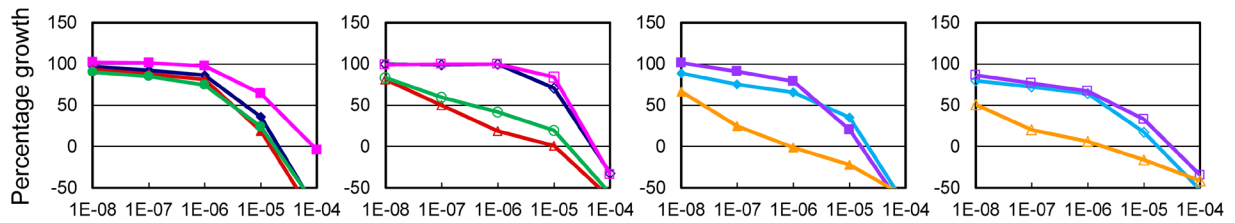

- |           |           |             |          |
|-----------|-----------|-------------|----------|
| ◆ HT-1080 | ◆ SK-UT-1 | ◆ HOS       | ◆ SW982  |
| ◆ SW684   | ◆ MES-SA  | ◆ KHOS-240S | ◆ SW1353 |
| ◆ GCT     | ◆ SJCRH30 | ◆ Saos-2    | ◆ RD-ES  |
| ◆ SW872   | ◆ RD      |             |          |

**E**

**ZSTK534**

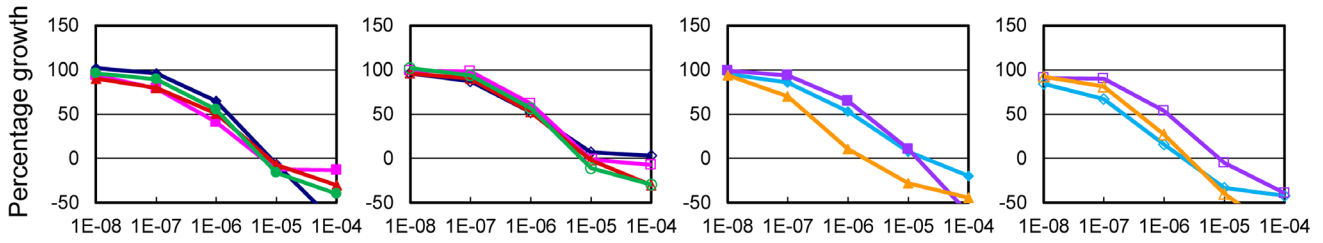

**ZSTK778**

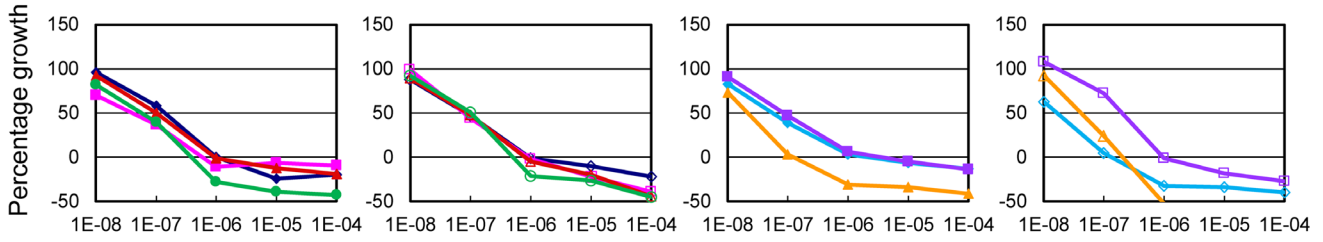

**ZSTK1741**

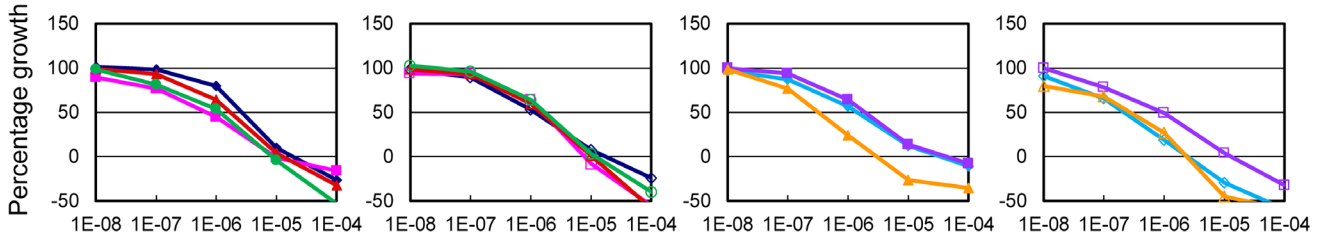

**ZSTK2209**

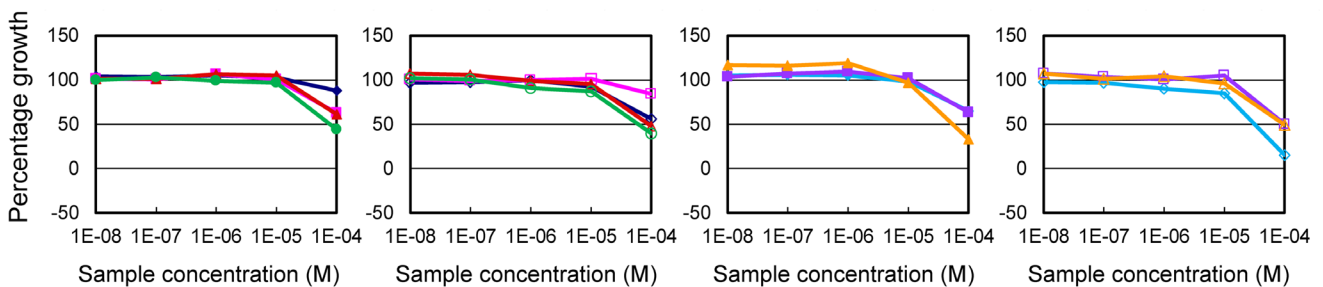

- |           |           |             |          |
|-----------|-----------|-------------|----------|
| ◆ HT-1080 | ◆ SK-UT-1 | ◆ HOS       | ◆ SW982  |
| ■ SW684   | ■ MES-SA  | ■ KHOS-240S | ■ SW1353 |
| ▲ GCT     | ▲ SJCRH30 | ▲ Saos-2    | ▲ RD-ES  |
| ● SW872   | ● RD      |             |          |

**Supplementary Figure 1: Concentration response curves of 24 anticancer agents against 14 sarcoma cell lines.** Growth inhibitory activity of each agent against each of the sarcoma cell lines within the panel was assessed as described in the Materials and Methods section. Concentration response curves of ifosfamide, doxorubicin, carboplatin, cisplatin and docetaxel (A); gemcitabine, imatinib, gefitinib, bortezomib and sorafenib (B); sunitinib, everolimus, selumetinib, pazopanib and vemurafenib (C); ZSTK474, pictilicib, buparlisib, alpelisib and linsitinib (D); ZSTK534, ZSTK778, ZSTK1741 and ZSTK2209 (E). Symbols were indicated as follows: closed blue diamonds, HT-1080; closed pink squares, SW684; closed red triangles, GCT; closed green circles, SW872; open blue diamonds, SK-UT-1; open pink squares, MES-SA; open red triangles, SJCRH30; open green circles, RD; closed cyan diamonds, HOS; closed purple squares, KHOS-240S; closed orange triangles, Saos-2; open cyan diamonds, SW982; open purple squares, SW1353; open orange triangles, RD-ES.

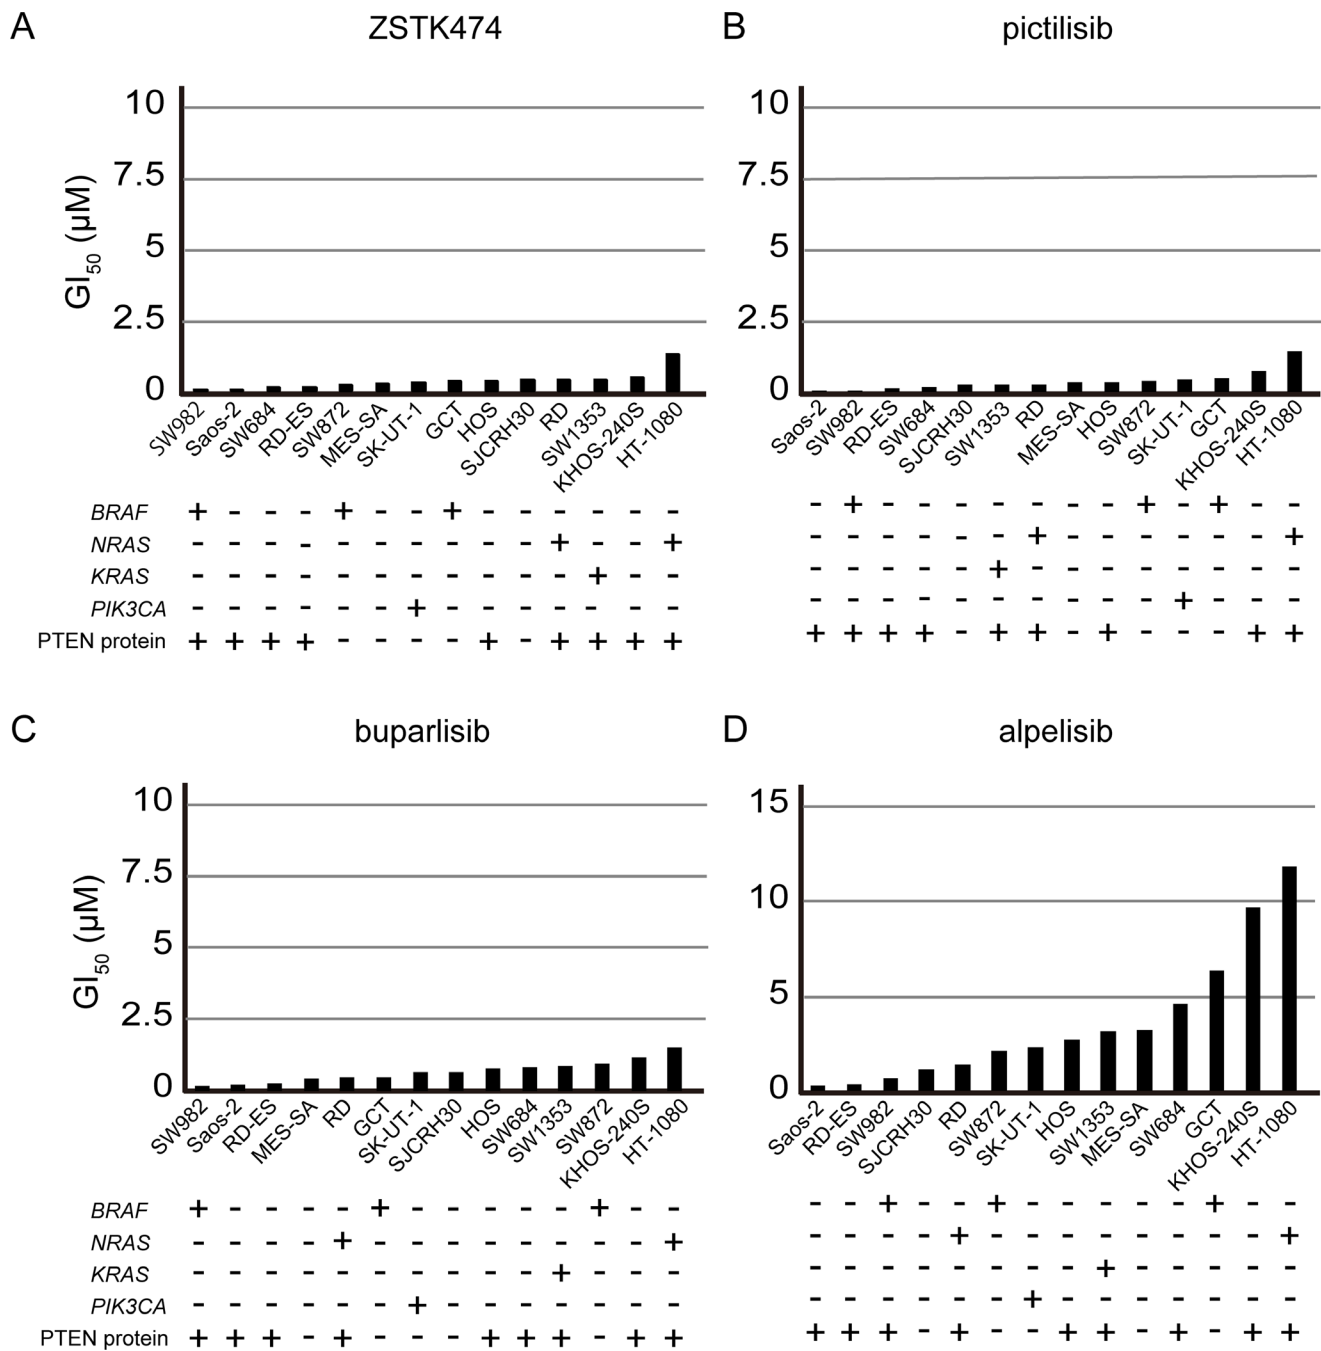

**Supplementary Figure 2: Association between drug efficacy of PI3K inhibitors and mutation status of *BRAF*, *KRAS*, *NRAS* and *PIK3CA* or protein expression status of *PTEN*.** (A–D) Fourteen sarcoma cell lines were arranged in ascending order of GI50 concentrations of the pan-PI3K inhibitors, ZSTK474 (A), pictilisib (B), buparlisib (C) or  $\alpha$ -specific PI3K inhibitor, alpelisib (D), with the mutation statuses of *BRAF*, *NRAS*, *KRAS* and *PIK3CA* and protein expression status of *PTEN* also indicated. No significant associations between mutation status and the efficacy of PI3K inhibitors were observed.

A

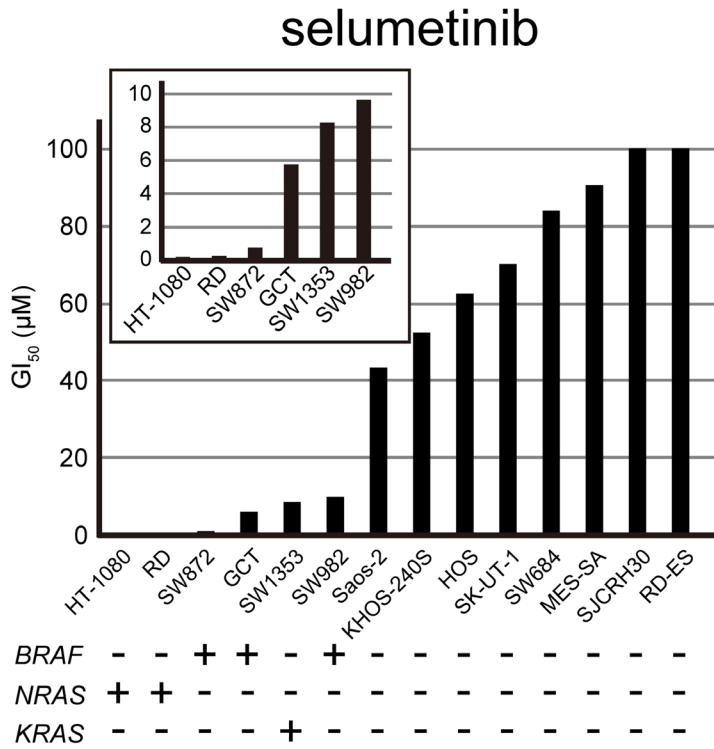

C

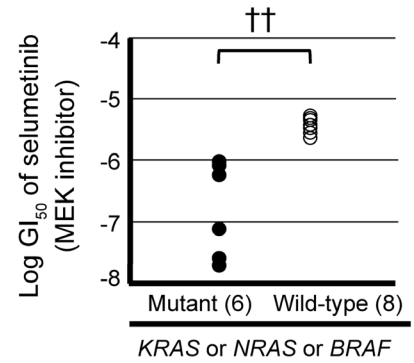

B

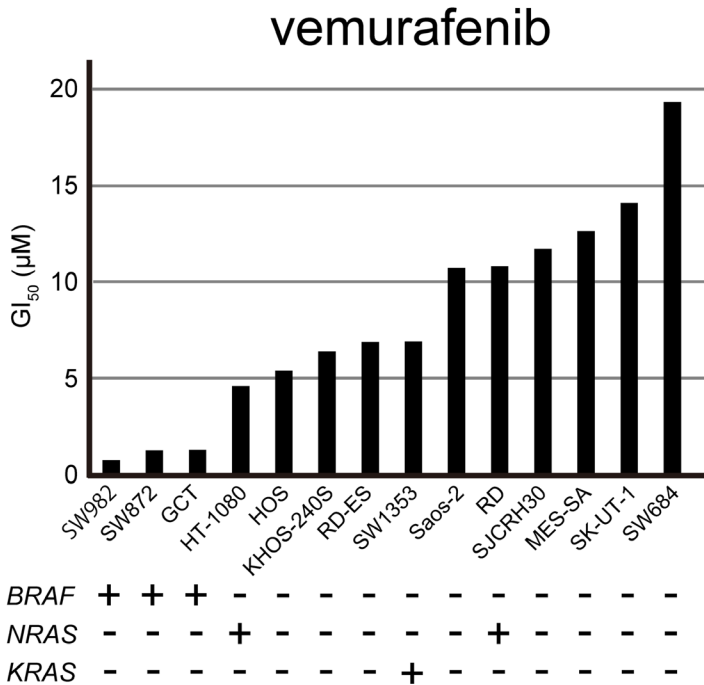

D

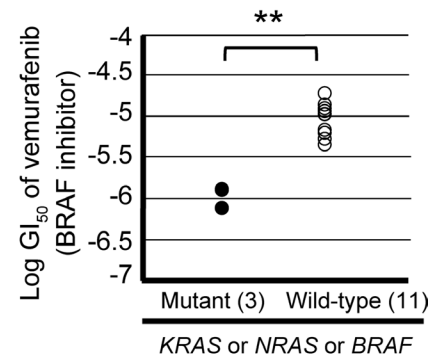

**Supplementary Figure 3: Association between drug efficacy of anticancer agents and *BRAF*/*NRAS*/*KRAS* mutation.**

(A, B) Fourteen sarcoma cell lines were arranged in ascending order of  $GI_{50}$  concentrations of MEK inhibitor (selumetinib) (A) or BRAF inhibitor (vemurafenib) (B), with the mutation statuses of *BRAF*, *NRAS* and *KRAS* genes also indicated. Inserted graph is an enlarged view of first 6 cell lines harboring *BRAF*/*NRAS*/*KRAS* mutation (A). (C, D) Differences in  $GI_{50}$  values of selumetinib (C) or vemurafenib (D) between two groups of sarcoma cell lines with or without *BRAF*/*NRAS*/*KRAS* mutation. The significance of any differences observed was determined by Mann–Whitney *U* test (\*\* $p < 0.01$ )/ Welch *t* test (\*\* $p < 0.01$ ).

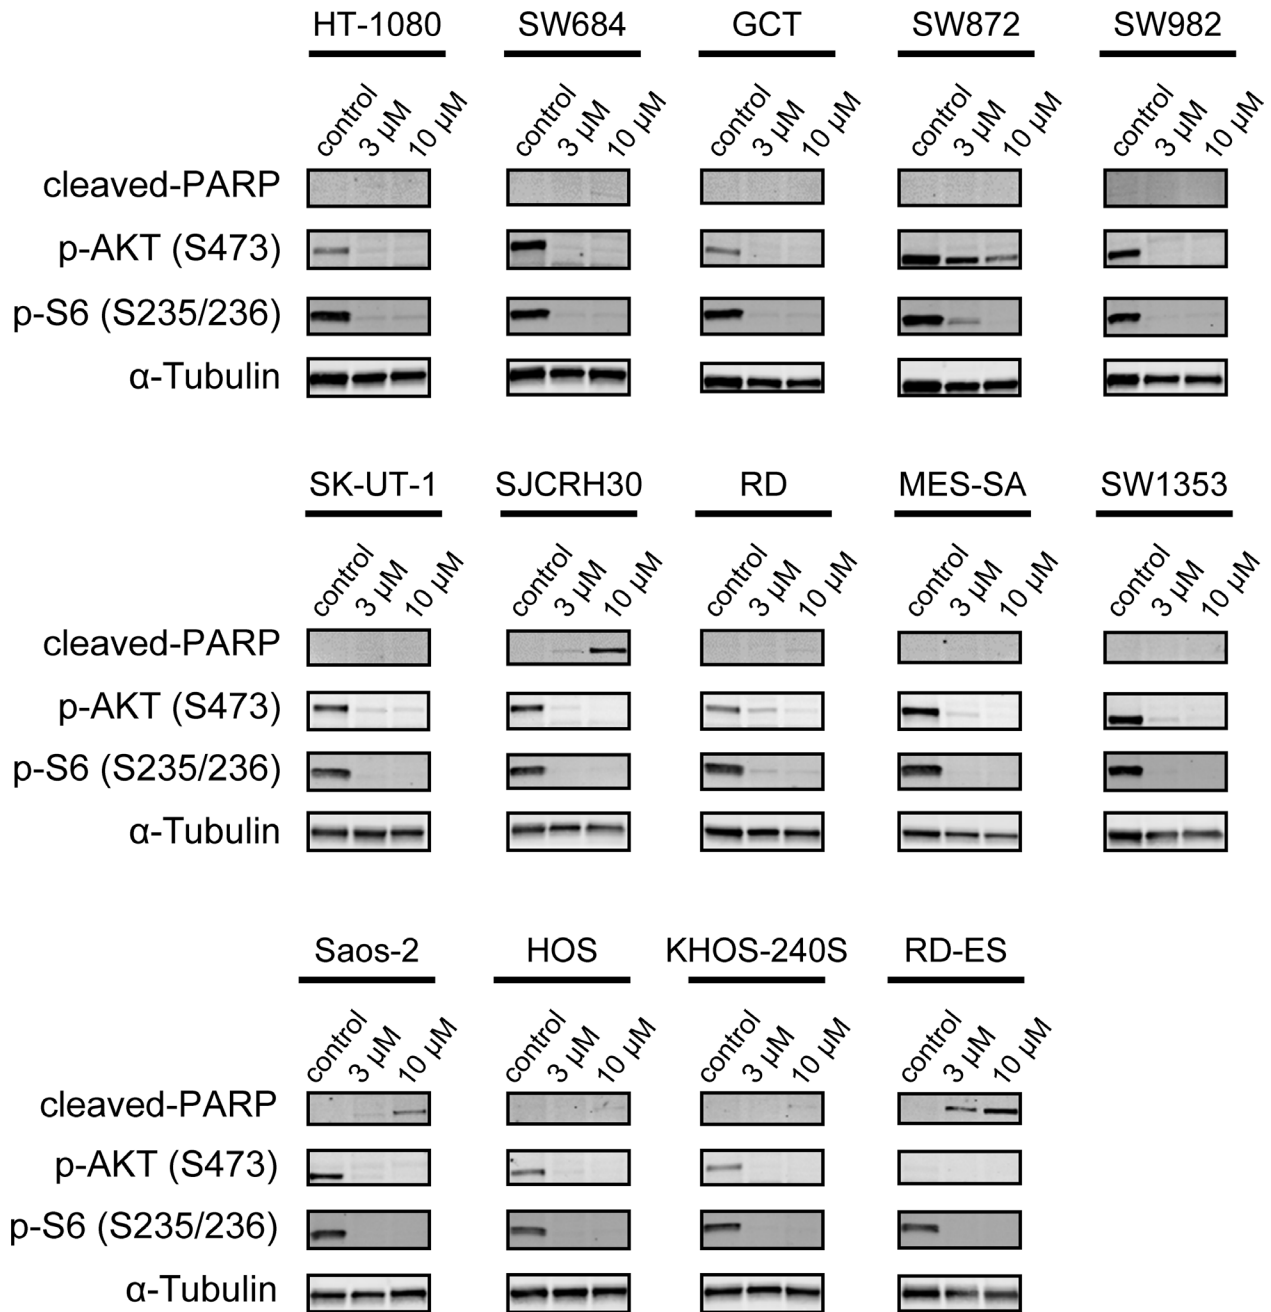

**Supplementary Figure 4: Effect of ZSTK474 on PI3K signaling pathway and apoptosis progression in 14 sarcoma cell lines *in vitro*.** The effect of ZSTK474 at higher concentrations against sarcoma cells was examined by Western blot analysis. Cells were treated with ZSTK474 at concentrations of 3  $\mu$ M and 10  $\mu$ M for 48 h and cell lysates were immunoblotted to detect phosphorylated AKT (Ser473), phosphorylated S6 (Ser235/236) and  $\alpha$ -tubulin as described in the Materials and Methods section.



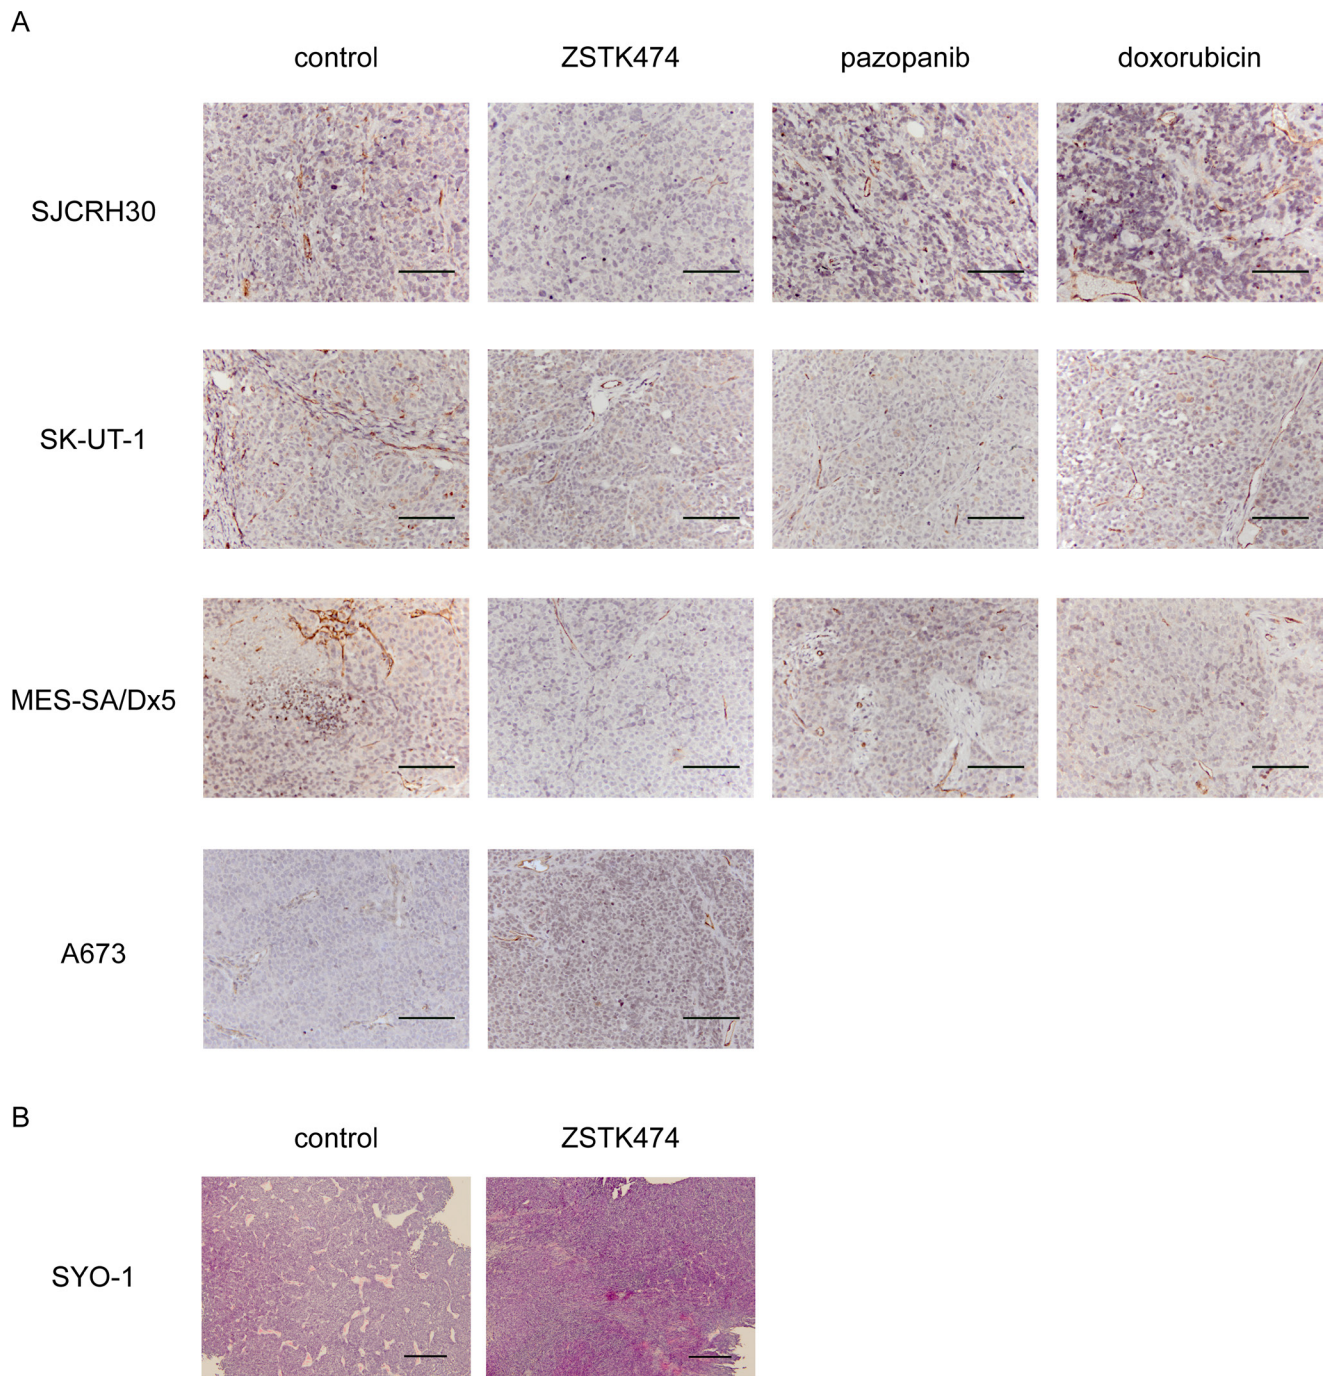

**Supplementary Figure 5: Representative images of xenografted tumor tissue sections of SJCRH30, SK-UT-1, MES-SA/Dx5, A673 and SYO-1 resected from mice before and after administration of ZSTK474, pazopanib or doxorubicin.** (A) Representative images of tumor vascularization in a tumor tissue section derived from SJCRH30, SK-UT-1 or MES-SA/Dx5 resected from control mice or mice administered with ZSTK474, pazopanib and doxorubicin, and an A673 tumor tissue section resected from control mice or mice administrated with ZSTK474, respectively. Vascular endothelial cells were detected by immunohistochemistry using an anti-CD31 antibody. Scale bars: 100  $\mu$ m. (B) Hematoxylin-eosin staining images of a SYO-1 tumor tissue section resected from control mice or mice treated with ZSTK474. Scale bars: 100  $\mu$ m.

## SJCRH30

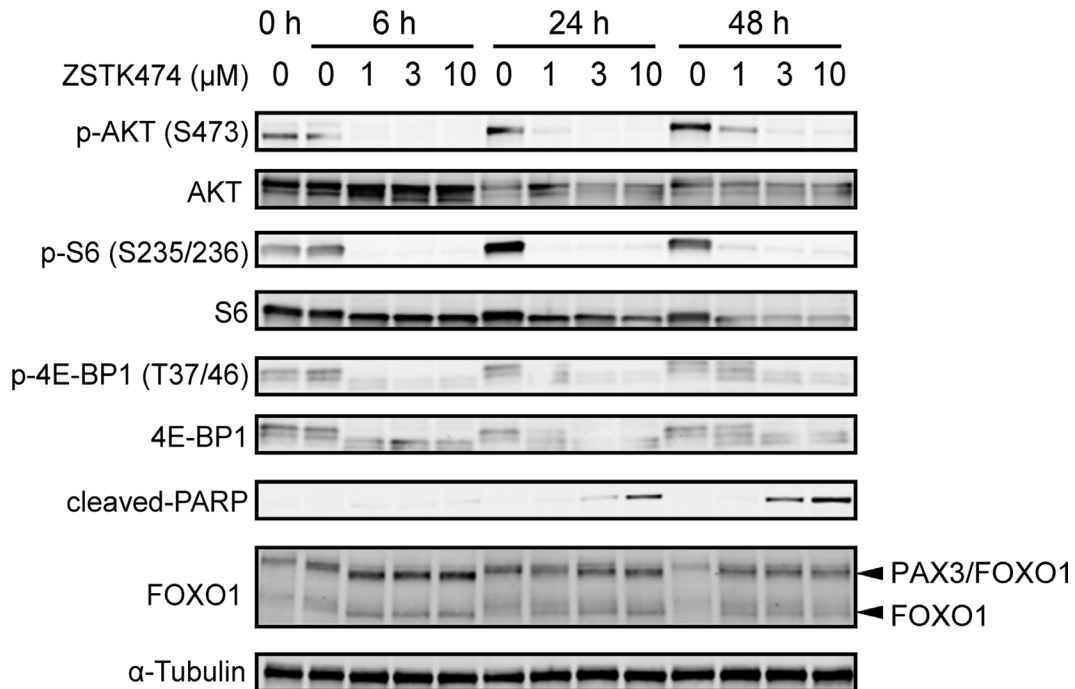

**Supplementary Figure 6: Effect on PI3K-downstream signaling pathway, apoptosis progression and protein expression of PAX3-FOXO1 upon treatment with ZSTK474 in alveolar rhabdomyosarcoma cell line, SJCRH30.** SJCRH30 cells were treated with ZSTK474 at the specified concentrations for the indicated time. Western blot analysis of phosphorylated AKT (S473), total AKT, phosphorylated S6 (S235/236), total S6, phosphorylated 4E-BP1 (T37/46), total 4E-BP1, cleaved-PARP, FOXO1 and  $\alpha$ -tubulin were performed as described in the Materials and Methods section.

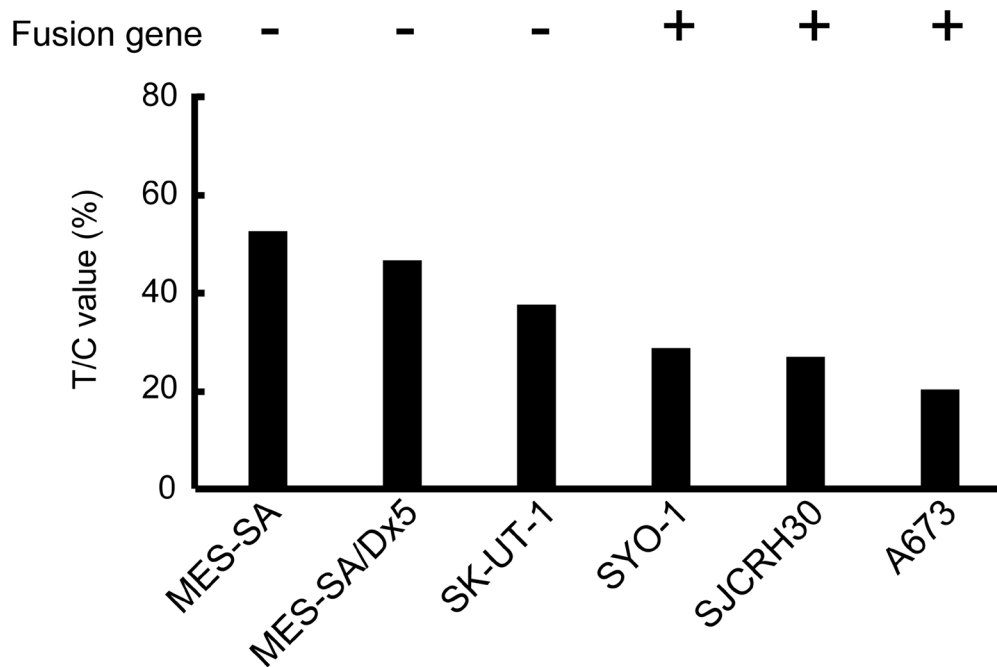

**Supplementary Figure 7: *In vivo* efficacy of ZSTK474 toward sarcoma cells xenografted in nude mice.** The *in vivo* efficacy of ZSTK474 against sarcoma cells was evaluated by treated/control ratio (T/C)%. “Fusion genes” included the following genes: *EWSR1-FLI1* (A673), *SS18-SX2* (SYO-1) and *PAX3-FOXO1* (SJCRH30).



Supplementary Table 2: Result of COMPARE analysis using ZSTK474 as a seed

| Rank | r      | Chemical name | p value  |
|------|--------|---------------|----------|
| 1    | 0.939  | ZSTK474       | <0.00001 |
| 2    | 0.921  | ZSTK778       | <0.00001 |
| 3    | 0.907  | ZSTK534       | <0.00001 |
| 4    | 0.888  | pictilisib    | <0.00001 |
| 5    | 0.867  | ZSTK1741      | 0.00003  |
| 6    | 0.852  | ZSTK778       | 0.00006  |
| 7    | 0.835  | ZSTK534       | 0.0001   |
| 8    | 0.811  | pictilisib    | 0.0002   |
| 9    | 0.808  | buparlisib    | 0.0003   |
| 10   | 0.801  | buparlisib    | 0.0003   |
| 11   | 0.763  | ZSTK1741      | 0.0009   |
| 12   | 0.696  | everolimus    | 0.004    |
| 13   | 0.676  | ZSTK2209      | 0.006    |
| 14   | 0.635  | ZSTK2209      | 0.011    |
| 15   | 0.628  | alpelisib     | 0.012    |
| 16   | 0.624  | alpelisib     | 0.013    |
| 17   | 0.609  | everolimus    | 0.016    |
| 18   | 0.47   | ifosfamide    | 0.077    |
| 19   | 0.464  | ifosfamide    | 0.081    |
| 20   | 0.38   | carboplatin   | 0.162    |
| 21   | 0.37   | carboplatin   | 0.174    |
| 22   | 0.253  | vemurafenib   | 0.362    |
| 23   | 0.219  | pazopanib     | 0.432    |
| 24   | 0.18   | linsitinib    | 0.522    |
| 25   | 0.174  | sunitinib     | 0.536    |
| 26   | 0.154  | linsitinib    | 0.584    |
| 27   | 0.13   | sunitinib     | 0.644    |
| 28   | 0.114  | docetaxel     | 0.686    |
| 29   | 0.072  | vemurafenib   | 0.799    |
| 30   | 0.027  | pazopanib     | 0.925    |
| 31   | 0.025  | sorafenib     | 0.929    |
| 32   | 0.001  | gefitinib     | 0.997    |
| 33   | -0.03  | cisplatin     | 0.914    |
| 34   | -0.031 | gefitinib     | 0.912    |
| 35   | -0.106 | docetaxel     | 0.706    |
| 36   | -0.138 | cisplatin     | 0.624    |
| 37   | -0.178 | doxorubicin   | 0.527    |
| 38   | -0.206 | doxorubicin   | 0.462    |
| 39   | -0.223 | gemcitabine   | 0.425    |
| 40   | -0.225 | gemcitabine   | 0.420    |
| 41   | -0.227 | bortezomib    | 0.416    |
| 42   | -0.284 | sorafenib     | 0.304    |
| 43   | -0.448 | imatinib      | 0.094    |
| 44   | -0.458 | selumetinib   | 0.086    |
| 45   | -0.458 | bortezomib    | 0.086    |
| 46   | -0.487 | selumetinib   | 0.066    |
| 47   | -0.784 | imatinib      | 0.0005   |

**Supplementary Table 3: Correlation between drug efficacy and the expression level of signal related proteins**

|             | p-AKT<br>(S473) |      | p-AKT<br>(T308) |      | p-S6<br>(S235/236) |      | p-IGF-1R<br>(Y1135/1136) |      | IGF-1R |      | p-ERK1/2<br>(T202/Y204) |      | p-MEK1/2<br>(S217/221) |      |
|-------------|-----------------|------|-----------------|------|--------------------|------|--------------------------|------|--------|------|-------------------------|------|------------------------|------|
|             | r               | p    | r               | p    | r                  | p    | r                        | p    | r      | p    | r                       | p    | r                      | p    |
| ZSTK474     | 0.18            | 0.54 | 0.20            | 0.48 | 0.05               | 0.85 | 0.21                     | 0.47 | 0.15   | 0.60 | 0.32                    | 0.26 | 0.00                   | 0.99 |
| ZSTK778     | 0.13            | 0.67 | 0.12            | 0.68 | -0.05              | 0.87 | 0.25                     | 0.38 | 0.17   | 0.56 | 0.24                    | 0.40 | -0.09                  | 0.77 |
| ZSTK534     | -0.08           | 0.78 | 0.01            | 0.98 | -0.18              | 0.55 | 0.29                     | 0.31 | 0.09   | 0.76 | 0.22                    | 0.46 | -0.12                  | 0.67 |
| ZSTK1741    | 0.02            | 0.93 | 0.04            | 0.90 | -0.04              | 0.90 | 0.41                     | 0.15 | 0.10   | 0.74 | 0.19                    | 0.52 | -0.05                  | 0.85 |
| ZSTK2209    | -0.19           | 0.52 | -0.24           | 0.41 | 0.04               | 0.90 | 0.30                     | 0.30 | 0.36   | 0.20 | 0.24                    | 0.40 | 0.37                   | 0.20 |
| pictilisib  | 0.03            | 0.91 | 0.07            | 0.81 | -0.18              | 0.54 | 0.33                     | 0.26 | 0.21   | 0.46 | 0.18                    | 0.55 | -0.11                  | 0.71 |
| buparlisib  | -0.16           | 0.59 | -0.10           | 0.74 | -0.07              | 0.82 | 0.41                     | 0.14 | 0.05   | 0.88 | -0.07                   | 0.82 | 0.02                   | 0.95 |
| alpelisib   | -0.44           | 0.11 | -0.18           | 0.53 | -0.11              | 0.70 | 0.55                     | 0.04 | 0.41   | 0.15 | -0.09                   | 0.76 | -0.10                  | 0.74 |
| everolimus  | 0.02            | 0.94 | -0.11           | 0.71 | 0.22               | 0.45 | 0.17                     | 0.56 | 0.37   | 0.20 | -0.12                   | 0.67 | 0.03                   | 0.91 |
| lisitinib   | -0.44           | 0.11 | -0.48           | 0.09 | -0.45              | 0.10 | 0.63                     | 0.02 | 0.44   | 0.12 | -0.39                   | 0.17 | -0.10                  | 0.74 |
| selumetinib | -0.32           | 0.26 | -0.33           | 0.24 | 0.26               | 0.37 | 0.06                     | 0.85 | 0.16   | 0.58 | 0.13                    | 0.65 | 0.66                   | 0.01 |
| vemurafenib | -0.45           | 0.11 | -0.33           | 0.25 | 0.51               | 0.07 | -0.17                    | 0.55 | 0.30   | 0.29 | 0.19                    | 0.52 | 0.55                   | 0.04 |
| gefitinib   | -0.32           | 0.26 | -0.37           | 0.19 | 0.01               | 0.99 | 0.34                     | 0.24 | 0.54   | 0.05 | 0.28                    | 0.34 | 0.38                   | 0.18 |
| sorafenib   | 0.00            | 1.00 | 0.04            | 0.90 | 0.22               | 0.46 | 0.31                     | 0.28 | 0.00   | 0.70 | -0.03                   | 0.96 | 0.28                   | 0.34 |
| imatinib    | -0.21           | 0.48 | -0.43           | 0.12 | 0.05               | 0.85 | -0.12                    | 0.69 | 0.35   | 0.23 | -0.57                   | 0.03 | -0.03                  | 0.91 |
| sunitinib   | -0.46           | 0.10 | -0.48           | 0.08 | -0.09              | 0.75 | 0.42                     | 0.13 | 0.37   | 0.19 | 0.08                    | 0.79 | 0.19                   | 0.51 |
| pazopanib   | -0.45           | 0.11 | -0.70           | 0.01 | 0.07               | 0.82 | 0.03                     | 0.91 | 0.33   | 0.25 | -0.64                   | 0.01 | 0.01                   | 0.99 |
| bortezomib  | 0.19            | 0.51 | -0.03           | 0.92 | 0.37               | 0.20 | 0.04                     | 0.90 | 0.22   | 0.45 | -0.11                   | 0.70 | 0.38                   | 0.18 |
| doxorubicin | -0.31           | 0.28 | -0.46           | 0.10 | -0.11              | 0.70 | 0.28                     | 0.33 | 0.26   | 0.37 | -0.34                   | 0.24 | -0.10                  | 0.75 |
| docetaxel   | -0.50           | 0.07 | -0.63           | 0.01 | -0.16              | 0.59 | 0.37                     | 0.19 | 0.38   | 0.18 | -0.16                   | 0.60 | 0.18                   | 0.55 |
| gemcitabine | -0.37           | 0.19 | -0.57           | 0.03 | -0.01              | 0.98 | 0.22                     | 0.45 | 0.22   | 0.46 | -0.54                   | 0.05 | 0.14                   | 0.64 |
| cisplatin   | -0.03           | 0.91 | -0.15           | 0.60 | 0.34               | 0.23 | 0.21                     | 0.48 | 0.10   | 0.74 | -0.38                   | 0.18 | 0.11                   | 0.70 |
| carboplatin | 0.02            | 0.95 | -0.11           | 0.72 | 0.29               | 0.32 | 0.29                     | 0.31 | 0.42   | 0.13 | 0.10                    | 0.75 | 0.30                   | 0.30 |
| ifosfamide  | -0.11           | 0.71 | -0.11           | 0.71 | 0.05               | 0.86 | 0.06                     | 0.84 | 0.11   | 0.71 | 0.38                    | 0.18 | 0.21                   | 0.47 |
